# Supplementary material
Source: publisher site journal article supplement (https://www.dovepress.com/article/610851)
Supplement: Supplementary file 1 [file 610851%20Supplementary%20Table%201.docx]

| Supplementary Table 1 Cut-off values for overweight and obesity screening by gender, age and BMI among school-aged children and adolescents aged 6-18 years  Unit:Kg/m2 | | | | |
| --- | --- | --- | --- | --- |
| age  （year） | male | | female | |
| overweight | obesity | overweight | obesity |
| 6 | 16.4 | 17.7 | 16.2 | 17.5 |
| 7 | 17.0 | 18.7 | 16.8 | 18.5 |
| 8 | 17.8 | 19.7 | 17.6 | 19.4 |
| 9 | 18.5 | 20.8 | 18.5 | 20.4 |
| 10 | 19.2 | 21.9 | 19.5 | 21.5 |
| 11 | 19.9 | 23.0 | 20.5 | 22.7 |
| 12 | 20.7 | 24.1 | 21.5 | 23.9 |
| 13 | 21.4 | 25.2 | 22.2 | 25.0 |
| 14 | 22.3 | 26.1 | 22.8 | 25.9 |
| 15 | 22.9 | 26.6 | 23.2 | 26.6 |
| 16 | 23.3 | 27.1 | 23.6 | 27.1 |
| 17 | 23.7 | 27.6 | 23.8 | 27.6 |
| 18 | 24.0 | 28.0 | 24.0 | 28.0 |
